# Supplementary material for: Geometric and topological characterization of the cytoarchitecture of islets of Langerhans
Source: PubMed Central journal article supplement (PMC10662755; doi:10.1371/journal.pcbi.1011617), 2023-11-09
Supplement: pcbi.1011617.s002.pdf [file pcbi.1011617.s002.pdf]

S1 Table

| <b>KS-significance test p-values for all islets</b> | <b>Stage 0</b>  | <b>Stage 1</b> | <b>Stage 2</b> |
|-----------------------------------------------------|-----------------|----------------|----------------|
| <b>Stage 1</b>                                      | 5E-22           |                |                |
| <b>Stage 2</b>                                      | 3E-186          | 1E-89          |                |
| <b>Stage 3</b>                                      | 0               | 5E-221         | 7E-20          |
|                                                     |                 |                |                |
|                                                     | <b>Diabetic</b> |                |                |
| <b>Control</b>                                      | 2E-08           |                |                |
