# Supplementary material for: Geometric and topological characterization of the cytoarchitecture of islets of Langerhans
Source: PubMed Central journal article supplement (PMC10662755; doi:10.1371/journal.pcbi.1011617), 2023-11-09
Supplement: pcbi.1011617.s003.pdf [file pcbi.1011617.s003.pdf]

S2 Table

| <b>KS-significance test p-values for islets with mantle around NS component</b> | <b>Stage 0</b> | <b>Stage 1</b>  | <b>Stage 2</b> | <b>Stage 3</b> |
|---------------------------------------------------------------------------------|----------------|-----------------|----------------|----------------|
| <b>Stage 0</b>                                                                  |                | 0.0001          | 0.0006         | 0.0001         |
| <b>Stage 1</b>                                                                  | 0.007          |                 | 0.0012         | 1E-10          |
| <b>Stage 2</b>                                                                  | 9E-15          | 7E-10           |                | 1E-05          |
| <b>Stage 3</b>                                                                  | 5E-18          | 9E-15           | 0.02           |                |
|                                                                                 |                |                 |                |                |
|                                                                                 | <b>Control</b> | <b>Diabetic</b> |                |                |
| <b>Control</b>                                                                  |                | 0.0003          |                |                |
| <b>Diabetic</b>                                                                 | 0.011          |                 |                |                |
