# Supplementary material for: Geometric and topological characterization of the cytoarchitecture of islets of Langerhans
Source: PubMed Central journal article supplement (PMC10662755; doi:10.1371/journal.pcbi.1011617), 2023-11-09
Supplement: pcbi.1011617.s004.pdf [file pcbi.1011617.s004.pdf]

S3 Table

| <b>Geom. vs. PH KS-significance test p-values</b> | <b>alpha-delta mantle around NS beta component</b> | <b>beta-mantle around NS alpha-delta component</b> |
|---------------------------------------------------|----------------------------------------------------|----------------------------------------------------|
| <b>Stage 0</b>                                    | 1                                                  | 1                                                  |
| <b>Stage 1</b>                                    | 1                                                  | 1                                                  |
| <b>Stage 2</b>                                    | 1                                                  | 1                                                  |
| <b>Stage 3</b>                                    | 1                                                  | 0.99                                               |
| <b>Control</b>                                    | 1                                                  | 1                                                  |
| <b>Diabetic</b>                                   | 1                                                  | 1                                                  |
