# Supplementary material for: Geometric and topological characterization of the cytoarchitecture of islets of Langerhans
Source: PubMed Central journal article supplement (PMC10662755; doi:10.1371/journal.pcbi.1011617), 2023-11-09
Supplement: pcbi.1011617.s005.pdf [file pcbi.1011617.s005.pdf]

Table 1

| ID  | Age | Sex |
|-----|-----|-----|
| D1  | 38  | F   |
| D2  | 42  | M   |
| D3  | 65  | F   |
| D4  | 66  | F   |
| D5  | 67  | F   |
| D6  | 67  | F   |
| D7  | 71  | F   |
| D8  | 71  | M   |
| D9  | 72  | F   |
| D10 | 73  | M   |
| D11 | 75  | F   |
| D12 | 81  | M   |
| C1  | 15  | M   |
| C2  | 21  | M   |
| C3  | 24  | M   |
| C4  | 41  | F   |
| C5  | 45  | F   |
| C6  | 47  | M   |
| C7  | 51  | F   |
| C8  | 51  | M   |
| C9  | 53  | M   |
| C10 | 63  | F   |
| C11 | 63  | F   |
| C12 | 68  | M   |
| C13 | 73  | M   |
| C14 | 81  | M   |
